# Supplementary material for: Immunoaffinity nanogold coupled with direct analysis in real time (DART) mass spectrometry for analytical toxicology
Source: Royal Society of Chemistry journal article supplement (doi:10.1039/c7ay00922d), 2017-01-01
Supplement: c7ay00922d1.pdf [file c7ay00922d1.pdf]

# Immunoaffinity Nanogold Coupled with Direct Analysis in Real Time (DART) Mass Spectrometry for Analytical Toxicology

K. M. Evans-Nguyen,\* T. L. Hargraves and A. Quinto

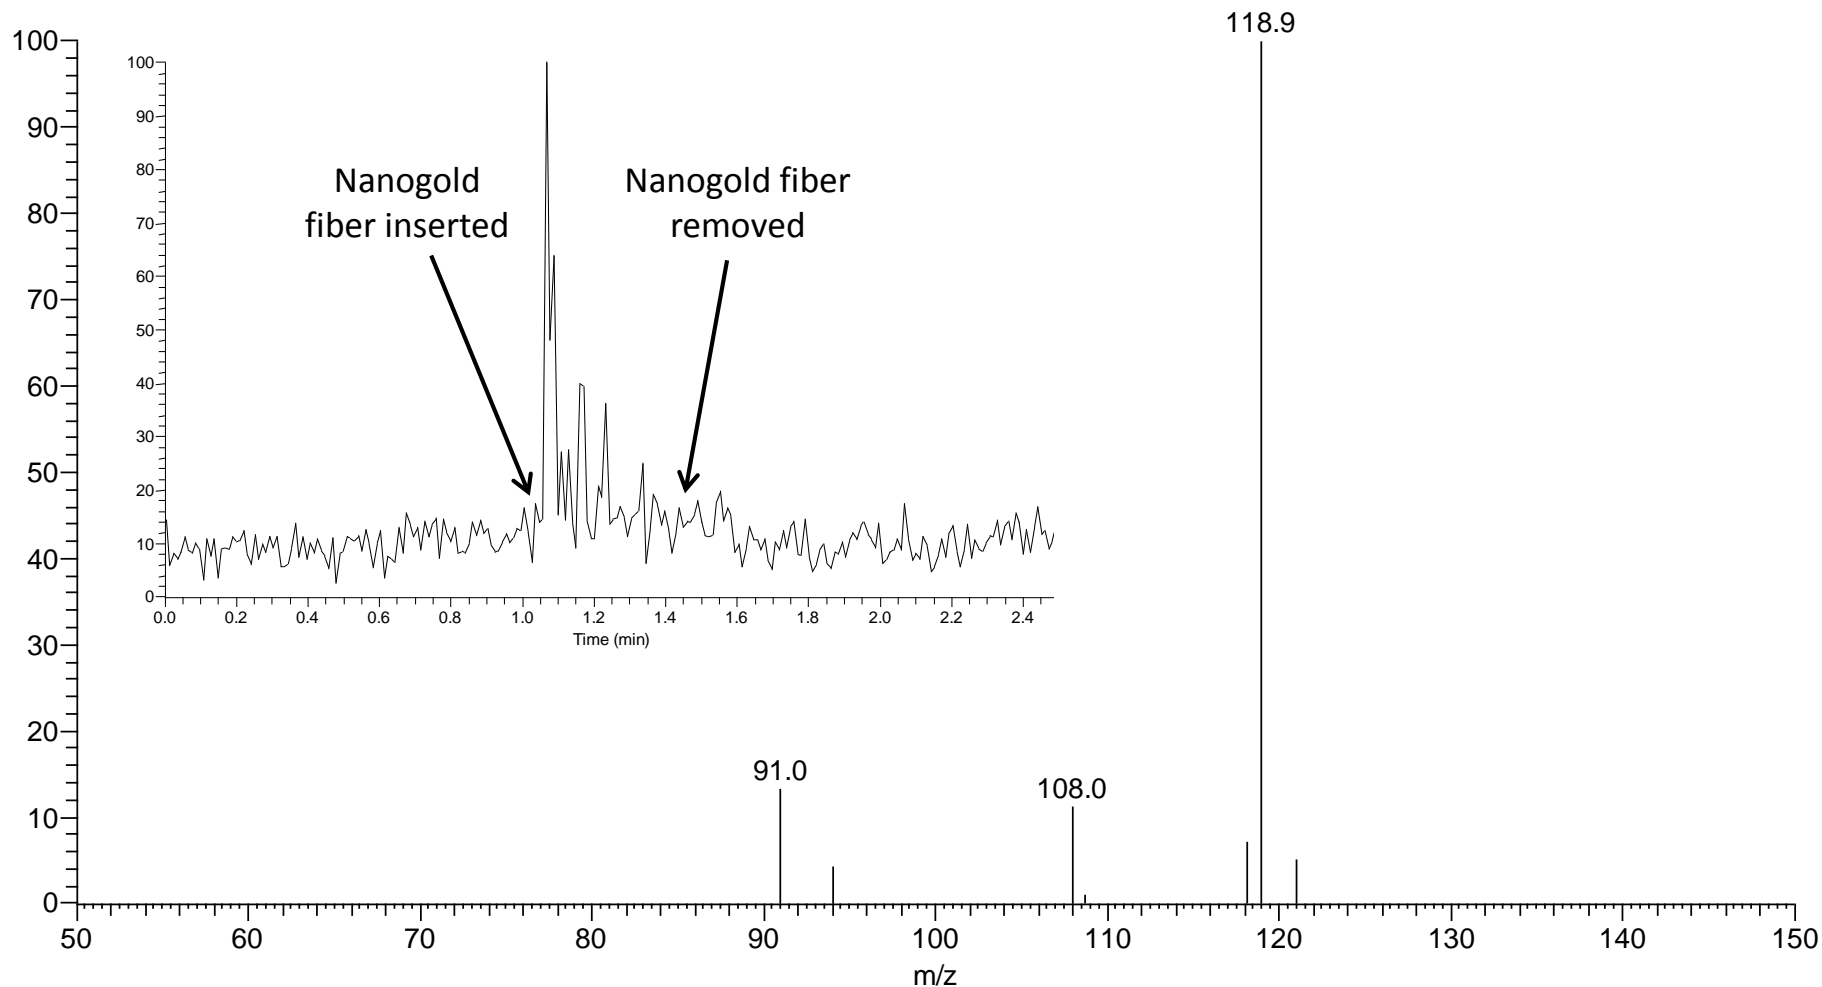

Figure S1. Representative time-dependent chromatogram data (inset) and MS/MS spectrum of amphetamine, captured from a 20 pg/mL solution in PBS using anti-amphetamine functionalized nanogold, and analysed with DART-MS/MS. The peak from the amphetamine is at m/z 118.9, while the other peaks are due to background.
